# Supplementary material
Source: PubMed Central journal article supplement (PMC3024658)
Supplement: 1006661107_pnas.1006661107_SI.pdf [file 1006661107_pnas.1006661107_SI.pdf]

# Supporting Information

Matino et al. 10.1073/pnas.1006661107

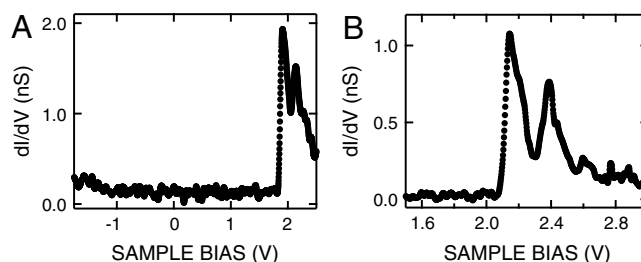

**Fig. S1.** (A) Differential conductance ( $dI/dV$ ) versus sample voltage  $V$  acquired over an unsubstituted NDI cyclophane. STM feedback was opened at  $I = 0.5$  nA,  $V = 2.5$  V. A sharp structure at positive voltages, the onset of a broader feature at the negative voltages and a large apparent zero-conductance gap are visible in the spectrum, similarly to the *tert*-butyl-thiol substituted NDI cyclophane case. (B) Detailed view of multiple peaks as in Fig. 2 recorded over an unsubstituted NDI cyclophane. An average peak distance of  $\approx 220$  mV was found from a linear fit of the peak positions. STM feedback was opened at  $I = 0.1$  nA,  $V = 3$  V.

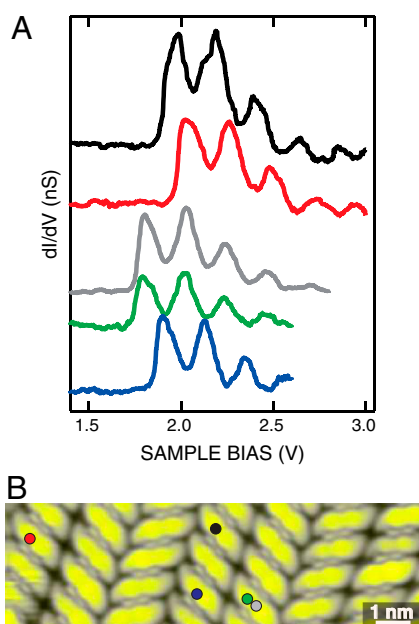

**Fig. S2.** (A)  $dI/dV$  data acquired at  $V = 3$  V (black and red spectra from top),  $V = 2.8$  V (gray spectrum),  $V = 2.6$  V (green and blue spectra) over the molecules marked in B using the same color code. It can be noted that spectra acquired at the same voltage over two different molecules show a different shift of the affinity level peaks ( $\approx 40$  mV in the black and red spectra, at  $V = 3$  V, and  $\approx 100$  mV in the blue and green spectra, at  $V = 2.6$  V), whereas spectra acquired over the same molecule at different initial setpoint ( $V = 2.8$  V and  $V = 2.6$  V) show no apparent shift (gray and green spectra). (B) Constant current STM image of NDI cyclophanes acquired at  $V = 2.2$  V,  $I = 50$  pA.

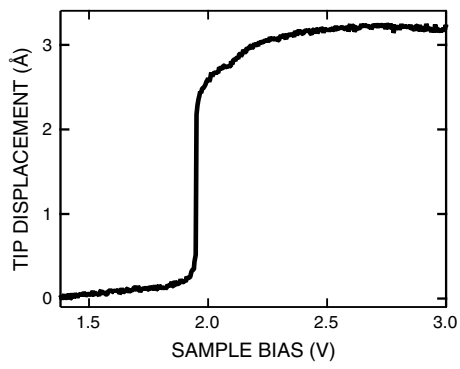

**Fig. S3.** Typical tip displacement as function of the applied voltage. The sample voltage was swept from  $V = 1.4$  V to  $V = 3$  V and the tip displacement was recorded, whereas the tunneling current was fixed at  $I = 50$  pA, with the feedback kept closed.
